# Supplementary material for: Bronze Mirrors from Xi’an Reveal Shifting Central Policies and Commercial Patterns in the Han Dynasty
Source: Research Square preprint supplement (doi:10.21203/rs.3.rs-8018389/v1), 2025-11-18
Supplement: Supplementary file 1 [file 4f4559ecd0c64a9e74072757.xlsx]

## Sheet: Sheet1
Lab. Number	Chronological Phase	206Pb/204Pb	2σ	207Pb/204Pb	2σ	208Pb/204Pb	2σ
MBH-09	Ⅰ	17.6728	0.0004	15.5336	0.0004	38.3378	0.0011
MBH-14	Ⅰ	17.6658	0.0003	15.5308	0.0003	38.3219	0.0008
MBH-08	Ⅱ	17.6515	0.0004	15.5295	0.0004	38.2826	0.001
MBH-10	Ⅱ	17.6487	0.0004	15.526	0.0004	38.2995	0.0012
MBH-16	Ⅱ	17.6246	0.0005	15.5245	0.0006	38.266	0.0017
MBH-02	Ⅲ	17.7554	0.0004	15.5538	0.0003	38.415	0.001
MBH-06	Ⅲ	17.7211	0.0003	15.5483	0.0004	38.4009	0.001
MBH-07	Ⅲ	17.5947	0.0004	15.529	0.0003	38.3562	0.0009
MBH-11	Ⅲ	17.7342	0.0003	15.5538	0.0003	38.389	0.0009
MBH-15	Ⅲ	17.8207	0.0005	15.5579	0.0005	38.4879	0.0012
MBH-22	Ⅲ	17.5083	0.0004	15.5196	0.0004	38.4037	0.001
MBH-23	Ⅳ	17.6274	0.0004	15.5278	0.0004	38.1489	0.0011
MBH-24	Ⅳ	17.6994	0.0004	15.5437	0.0003	38.3449	0.0009
MBH-01	Ⅳ	17.9832	0.0004	15.5962	0.0004	38.5722	0.0009
MBH-03	Ⅳ	17.6903	0.0004	15.5464	0.0004	38.4357	0.0011
MBH-04	Ⅳ	17.7657	0.0004	15.5578	0.0004	38.4407	0.001
MBH-05	Ⅳ	17.8461	0.0005	15.5663	0.0006	38.4594	0.0016
MBH-12	Ⅳ	17.6302	0.0005	15.5241	0.0005	38.3537	0.0012
MBH-13	Ⅳ	17.8656	0.0005	15.5756	0.0005	38.4403	0.0015
MBH-20	Ⅴ	17.9282	0.0005	15.5908	0.0004	38.4983	0.0012
MBH-21	Ⅴ	17.9128	0.0003	15.5838	0.0003	38.4759	0.0009
MBH-25	Ⅵ	18.3631	0.0005	15.6891	0.0004	38.8381	0.0013
MBH-26	Ⅵ	18.2217	0.0006	15.6631	0.0005	38.7203	0.0013
MBH-27	Ⅶ	18.3671	0.0005	15.6735	0.0005	38.8237	0.0013
MBH-17	Ⅶ	18.3457	0.0004	15.6749	0.0004	38.811	0.0011
